# Supplementary material
Source: HighWire-hosted journal article supplement (https://bmjopen.bmj.com/content/12/4/e049296)
Supplement: inline-supplementary-material-1 [file inline-supplementary-material-1.pdf]

## **Appendix A: Search Strings**

### **HMIC:**

("Integrated Health\*" OR "Integrating Health\*" OR "Integrated Care\*") AND (Factor\* OR Perform\* OR Success\* OR Fail\*)

Limits: 2000 - Current

### **Nuffield Trust:**

("Integrated Health\*" OR "Integrating Health\*" OR "Integrated Care\*") AND (Factor\* OR Perform\* OR Success\* OR Fail\*)

Limits:

Years: 1997-2020

Content Type: Report, Journal Article

### **CINAHL:**

NHS AND ("Integrated Health\*" OR "Integrating Health\*" OR "Integrated Care\*") AND (Factor\* OR Perform\* OR Success\* OR Fail\*)

Limits: December 1997 - April 2020, English Language

### **PubMed:**

NHS AND ("Integrated Health\*" OR "Integrating Health\*" OR "Integrated Care\*") AND (Factor\* OR Perform\* OR Success\* OR Fail\*)

Limits: 08/12/1997-08/04/2020, English Language

### **NICE Evidence:**

NHS AND ("Integrated Health\*" OR "Integrating Health\*" OR "Integrated Care\*") AND (Factor\* OR Perform\* OR Success\* OR Fail\*)

Limits: 2000-2020

**HSE:**

("Integrated Health" OR "Integrating Health" OR "Integrated Care") AND (Factor OR Perform OR Success OR Fail)

Limits: 2000-2020
